# Supplementary material for: The impact of maternal age on gene expression during the GV to MII transition in euploid human oocytes
Source: PubMed Central journal article supplement — Hum Reprod. 2021 Nov 10;37(1):80–92. doi: 10.1093/humrep/deab226 (PMC8730309; doi:10.1093/humrep/deab226), 2021-11-10
Supplement: deab226_supplementary_table_s5.pdf [file deab226_supplementary_table_s5.pdf]

**Supplementary Table SV Biological processes and cellular components for the gene transcripts enriched in YMA GV and MII oocytes.**

| <b>YMA GV up</b>                                                  |                |                  |            |
|-------------------------------------------------------------------|----------------|------------------|------------|
| <b>Biological process</b>                                         |                |                  |            |
| <b>Term</b>                                                       | <b>P-value</b> | <b>Benjamini</b> | <b>FDR</b> |
| Mitochondrial translational termination                           | 5.2E-9         | 2.1E-5           | 9.6E-6     |
| Mitochondrial translational elongation                            | 1.6E-8         | 3.4E-5           | 3.1E-5     |
| Transcription-coupled nucleotide-excision repair                  | 8.0E-7         | 1.1E-3           | 1.5E-3     |
| Proteasome-mediated ubiquitin-dependent protein catabolic process | 1.9E-6         | 2.0E-3           | 3.6E-3     |
| mRNA splicing, via spliceosome                                    | 2.0E-6         | 1.7E-3           | 3.7E-3     |
| Mitochondrial translation                                         | 2.8E-6         | 1.9E-3           | 5.1E-3     |
| RNA secondary structure unwinding                                 | 1.1E-5         | 6.3E-3           | 2.0E-2     |
| Regulation of translational initiation                            | 1.5E-5         | 8.0E-3           | 2.9E-2     |
| tRNA processing                                                   | 2.2E-5         | 1.0E-2           | 4.2E-2     |
| Cell division                                                     | 2.4E-5         | 9.8E-3           | 4.4E-2     |

| <b>YMA MII up</b>                                                   |                |                  |            |
|---------------------------------------------------------------------|----------------|------------------|------------|
| <b>Biological process</b>                                           |                |                  |            |
| <b>Term</b>                                                         | <b>P-value</b> | <b>Benjamini</b> | <b>FDR</b> |
| Viral transcription                                                 | 3.3E-15        | 1.2E-11          | 5.9E-12    |
| Cell division                                                       | 1.2E-13        | 2.1E-10          | 2.1E-10    |
| Nuclear-transcribed mRNA catabolic process, nonsense-mediated decay | 4.6E-12        | 5.5E-9           | 8.4E-9     |
| Cell-cell adhesion                                                  | 2.1E-10        | 1.9E-7           | 3.9E-7     |
| Protein sumoylation                                                 | 3.0E-10        | 2.2E-7           | 5.5E-7     |
| Translational initiation                                            | 3.5E-10        | 2.1E-7           | 6.4E-7     |
| rRNA processing                                                     | 3.5E-10        | 1.8E-7           | 6.4E-7     |
| SRP-dependent cotranslational protein targeting to membrane         | 4.5E-10        | 2.0E-7           | 8.2E-7     |
| DNA repair                                                          | 2.8E-9         | 1.1E-6           | 5.1E-6     |
| RNA splicing                                                        | 6.5E-9         | 2.4E-6           | 1.2E-5     |
| mRNA export from nucleus                                            | 4.3E-8         | 1.4E-5           | 7.9E-5     |
| Mitotic nuclear division                                            | 4.6E-8         | 1.4E-5           | 8.5E-5     |

(continued)

**Supplementary Table SV Continued**

| <b>YMA MII up</b>                              |                |                  |            |
|------------------------------------------------|----------------|------------------|------------|
| <b>Biological process</b>                      |                |                  |            |
| <b>Term</b>                                    | <b>P-value</b> | <b>Benjamini</b> | <b>FDR</b> |
| mRNA splicing, via spliceosome                 | 1.0E-7         | 2.8E-5           | 1.8E-4     |
| Viral process                                  | 1.5E-7         | 3.8E-5           | 2.7E-4     |
| Covalent chromatin modification                | 1.6E-7         | 3.8E-5           | 2.9E-4     |
| G2/M transition of mitotic cell cycle          | 2.6E-7         | 5.9E-5           | 4.8E-4     |
| Cilium assembly                                | 3.3E-7         | 7.1E-5           | 6.1E-4     |
| Cellular response to DNA damage stimulus       | 3.6E-7         | 7.3E-5           | 6.6E-4     |
| tRNA export from nucleus                       | 3.0E-6         | 5.7E-4           | 5.5E-3     |
| RNA export from nucleus                        | 3.4E-6         | 6.2E-4           | 6.3E-3     |
| Sister chromatid cohesion                      | 4.5E-6         | 7.7E-4           | 8.2E-3     |
| Gene silencing by RNA                          | 5.1E-6         | 8.4E-4           | 9.3E-3     |
| Termination of RNA polymerase II transcription | 6.7E-6         | 1.1E-3           | 1.2E-2     |
| Mitotic cytokinesis                            | 6.8E-6         | 1.0E-3           | 1.3E-2     |
| Cilium morphogenesis                           | 2.2E-5         | 3.1E-3           | 4.0E-2     |

| <b>YMA GV up</b>                      |                |                  |            |
|---------------------------------------|----------------|------------------|------------|
| <b>Cellular component</b>             |                |                  |            |
| <b>Term</b>                           | <b>P-value</b> | <b>Benjamini</b> | <b>FDR</b> |
| Mitochondrion                         | 1.8E-19        | 1.5E-16          | 2.8E-16    |
| Nucleoplasm                           | 6.8E-19        | 2.8E-16          | 1.0E-15    |
| Mitochondrial inner membrane          | 3.7E-18        | 1.0E-15          | 5.7E-15    |
| Cytosol                               | 6.7E-14        | 1.4E-11          | 1.0E-10    |
| Cytoplasm                             | 1.5E-12        | 2.5E-10          | 2.3E-9     |
| Nucleus                               | 3.7E-10        | 5.0E-8           | 5.7E-7     |
| Nucleolus                             | 1.2E-8         | 1.4E-6           | 1.8E-5     |
| Mitochondrial matrix                  | 1.8E-7         | 1.8E-5           | 2.7E-4     |
| Myelin sheath                         | 1.9E-7         | 1.7E-5           | 3.0E-4     |
| Mitochondrial large ribosomal subunit | 2.1E-7         | 1.7E-5           | 3.3E-4     |
| Membrane                              | 4.0E-7         | 3.0E-5           | 6.1E-4     |
| Mitochondrial intermembrane space     | 1.8E-6         | 1.2E-4           | 2.8E-3     |
| Proteasome complex                    | 2.5E-6         | 1.6E-4           | 3.9E-3     |
| Eukaryotic 48S preinitiation complex  | 5.4E-6         | 3.2E-4           | 8.3E-3     |

(continued)

## Supplementary Table SV Continued

| <b>YMA GV up</b>                                   |                |                  |            |
|----------------------------------------------------|----------------|------------------|------------|
| <b>Cellular component</b>                          |                |                  |            |
| <b>Term</b>                                        | <b>P-value</b> | <b>Benjamini</b> | <b>FDR</b> |
| Eukaryotic translation initiation factor 3 complex | 2.1E–5         | 1.2E–3           | 3.3E–2     |
| Proteasome accessory complex                       | 2.1E–5         | 1.2E–3           | 3.3E–2     |
| <b>YMA MII up</b>                                  |                |                  |            |
| <b>Cellular component</b>                          |                |                  |            |
| <b>Term</b>                                        | <b>P-value</b> | <b>Benjamini</b> | <b>FDR</b> |
| Nucleoplasm                                        | 2.0E–59        | 1.6E–56          | 3.1E–56    |
| Nucleus                                            | 9.0E–27        | 3.5E–24          | 1.4E–23    |
| Centrosome                                         | 6.2E–17        | 2.9E–14          | 1.7E–13    |
| Cytoplasm                                          | 3.0E–15        | 5.8E–13          | 4.6E–12    |
| Cytosol                                            | 5.0E–14        | 7.7E–12          | 7.6E–11    |
| Cell–cell adherens junction                        | 5.4E–11        | 7.1E–9           | 8.3E–8     |
| Nucleolus                                          | 9.5E–11        | 1.1E–8           | 1.4E–7     |
| Nuclear speck                                      | 7.3E–10        | 7.1E–8           | 1.1E–6     |
| Cytosolic small ribosomal subunit                  | 6.9E–9         | 5.9E–7           | 1.1E–5     |
| Centriole                                          | 2.4E–8         | 1.9E–6           | 3.7E–5     |
| Membrane                                           | 2.7E–7         | 1.9E–5           | 4.1E–4     |
| Chromosome                                         | 3.1E–7         | 2.0E–5           | 4.7E–4     |
| Ribosome                                           | 4.1E–7         | 2.5E–5           | 6.3E–4     |
| Intracellular ribonucleoprotein complex            | 4.5E–7         | 2.5E–5           | 6.8E–4     |
| Focal adhesion                                     | 1.2E–6         | 6.1E–5           | 1.8E–3     |
| Ciliary basal body                                 | 4.4E–6         | 2.1E–4           | 6.7E–3     |
| Catalytic step 2 spliceosome                       | 5.5E–6         | 2.5E–4           | 8.3E–3     |
| Microtubule organising centre                      | 1.6E–5         | 6.8E–4           | 2.4E–2     |
| Chromosome, telomeric region                       | 3.1E–5         | 1.2E–3           | 4.7E–2     |

P-value, Benjamini and FDR are also reported.

FDR, false discovery rate; GV, germinal vesicle; MII, metaphase II; YMA, young maternal age.
