# Supplementary material for: The impact of maternal age on gene expression during the GV to MII transition in euploid human oocytes
Source: PubMed Central journal article supplement — Hum Reprod. 2021 Nov 10;37(1):80–92. doi: 10.1093/humrep/deab226 (PMC8730309; doi:10.1093/humrep/deab226), 2021-11-10
Supplement: deab226_supplementary_table_s7.pdf [file deab226_supplementary_table_s7.pdf]

**Supplementary Table SVII Biological processes and cellular components for the transcripts enriched in AMA GV and MII oocytes, exclusively in the GV/II transition.**

| <b>AMA MII only</b> |                                                                      |              |          |                |                  |            |
|---------------------|----------------------------------------------------------------------|--------------|----------|----------------|------------------|------------|
| <b>Category</b>     | <b>Term</b>                                                          | <b>Count</b> | <b>%</b> | <b>P-value</b> | <b>Benjamini</b> | <b>FDR</b> |
| BP                  | Positive regulation of transcription, DNA-templated                  | 36           | 0.0      | 3.0E–5         | 6.9E–2           | 5.3E–2     |
| BP                  | Positive regulation of transcription from RNA polymerase II promoter | 56           | 0.1      | 4.8E–5         | 5.5E–2           | 8.5E–2     |
| <b>Category</b>     | <b>Term</b>                                                          | <b>Count</b> | <b>%</b> | <b>P-value</b> | <b>Benjamini</b> | <b>FDR</b> |
| CC                  | Nucleus                                                              | 234          | 0.2      | 2.6E–9         | 1.2E–6           | 3.7E–6     |
| CC                  | Nucleoplasm                                                          | 138          | 0.1      | 1.2E–8         | 2.7E–6           | 1.7E–5     |
| CC                  | Cytoplasm                                                            | 218          | 0.2      | 2.9E–7         | 4.6E–5           | 4.1E–4     |
| CC                  | Nuclear speck                                                        | 20           | 0.0      | 1.7E–5         | 2.0E–3           | 2.5E–2     |
| <b>AMA GV only</b>  |                                                                      |              |          |                |                  |            |
| <b>Category</b>     | <b>Term</b>                                                          | <b>Count</b> | <b>%</b> | <b>P-value</b> | <b>Benjamini</b> | <b>FDR</b> |
| BP                  | Mitochondrial electron transport, NADH to ubiquinone                 | 17           | 0.0      | 2.8E–8         | 8.9E–5           | 5.1E–5     |
| BP                  | Mitochondrial respiratory chain complex I assembly                   | 18           | 0.0      | 2.4E–7         | 3.8E–4           | 4.4E–4     |
| BP                  | Mitochondrial translational elongation                               | 20           | 0.0      | 1.2E–6         | 1.2E–3           | 2.1E–3     |
| BP                  | Mitochondrial translational termination                              | 18           | 0.0      | 2.4E–5         | 1.9E–2           | 4.3E–2     |
| <b>Category</b>     | <b>Term</b>                                                          | <b>Count</b> | <b>%</b> | <b>P-value</b> | <b>Benjamini</b> | <b>FDR</b> |
| CC                  | Mitochondrion                                                        | 148          | 0.1      | 2.6E–12        | 1.6E–9           | 3.9E–9     |
| CC                  | Mitochondrial inner membrane                                         | 69           | 0.0      | 3.0E–12        | 9.0E–10          | 4.4E–9     |
| CC                  | Mitochondrial respiratory chain complex I                            | 16           | 0.0      | 1.6E–7         | 3.1E–5           | 2.3E–4     |
| CC                  | Cytosol                                                              | 260          | 0.1      | 2.5E–5         | 3.9E–3           | 3.8E–2     |
| CC                  | Extracellular exosome                                                | 219          | 0.1      | 2.0E–4         | 2.4E–2           | 3.0E–1     |

AMA, advanced maternal age; BP, biological process; CC, cellular component; GV, germinal vesicle; MII, metaphase II.
